# Supplementary material
Source: PubMed Central journal article supplement (PMC5011681)

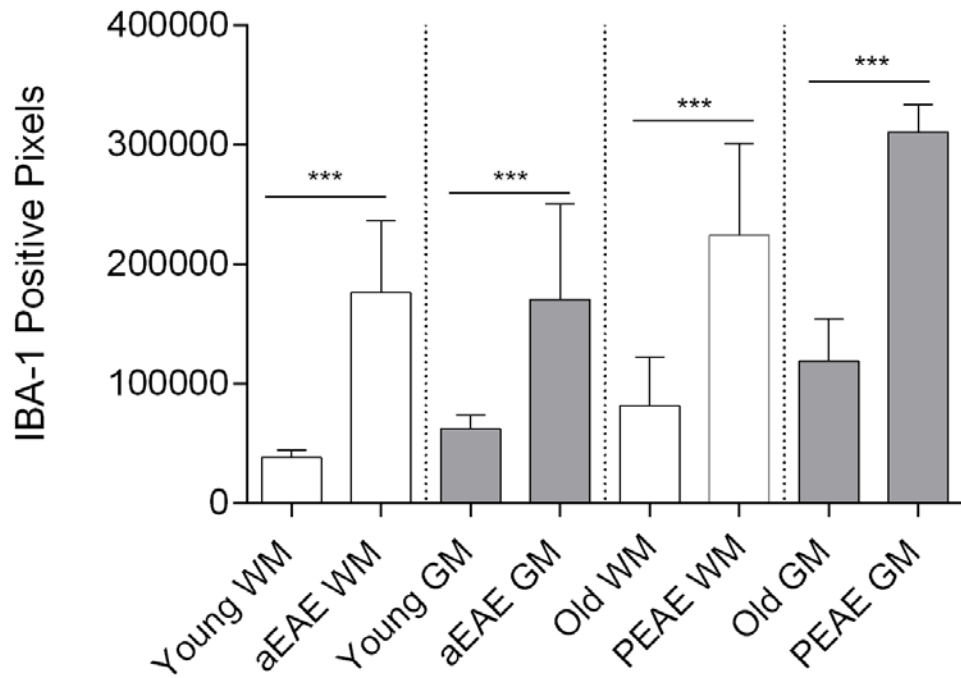

Supplement: IMM-149-146-s001.pdf [file IMM-149-146-s001.pdf]
